# Supplementary material for: The dynamic stator stalk of rotary ATPases
Source: PubMed Central journal article supplement — Nat Commun. 2012 Feb 21;3:687–. doi: 10.1038/ncomms1693 (PMC3293630; doi:10.1038/ncomms1693), 2012-02-21
Supplement: ncomms1693-s1.pdf [file ncomms1693-s1.pdf]

**Supplementary Figure S1: F-type rotation axes are off-center from  $(\alpha\beta)_3$  axes**

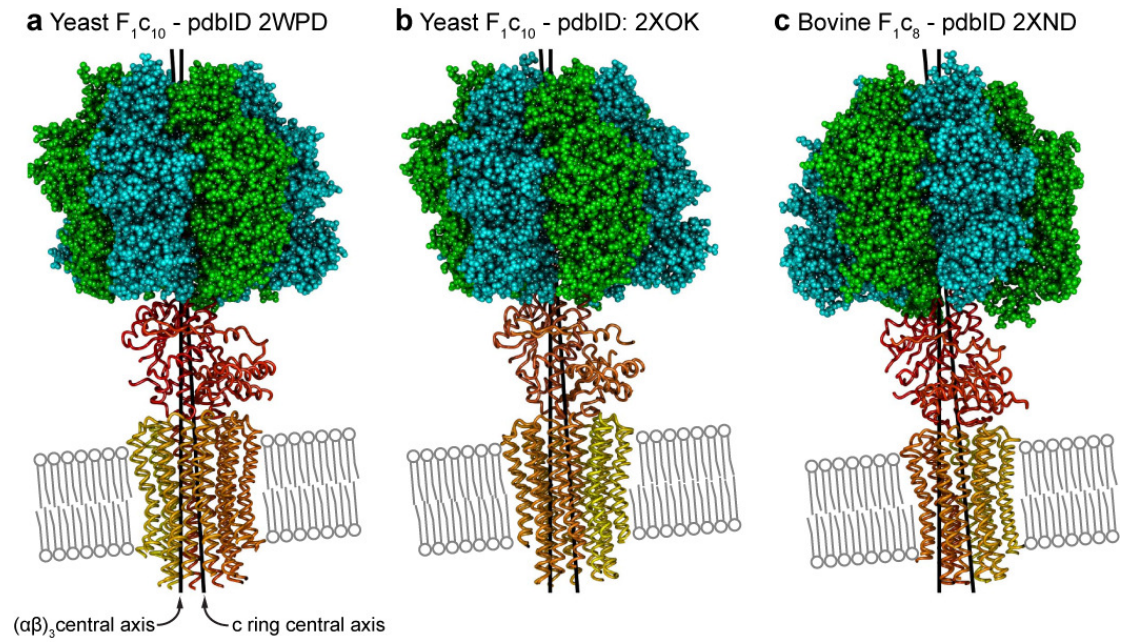

F-type rotation axes off-center from  $(\alpha\beta)_3$  axes (see Table 1 for values of inclination). Crystal structures of yeast and bovine  $F_1c_n$  complexes, with the central axis through the catalytic  $(\alpha\beta)_3$  head and the axis through the center of the c-ring labelled. **(a)**  $F_1c_{10}$  (2WPD)<sup>28</sup>, **(b)**  $F_1c_{10}$  (2XOK)<sup>27</sup> and **(c)**  $F_1c_8$  (2XND)<sup>29</sup>.

**Supplementary Figure S2: PS1, PS2 and PS3 fitted to the EM density of the proximal peripheral stalk**

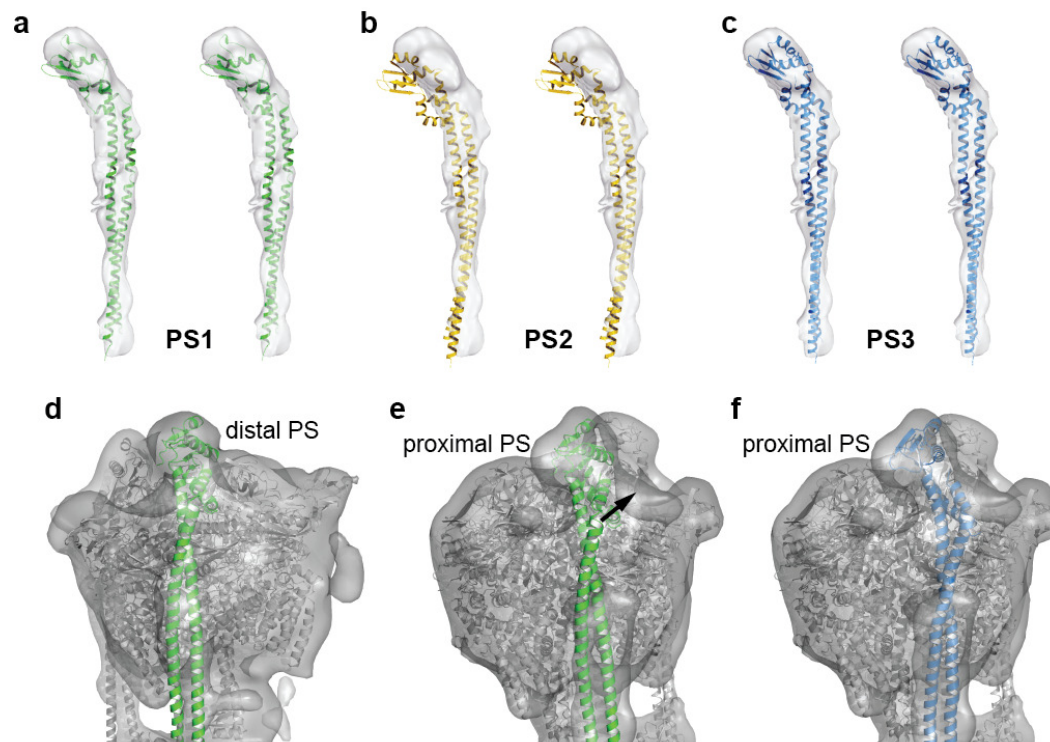

PS1 (a), PS2 (b) and PS3 (c) fitted into the EM density of the proximal peripheral stalk<sup>10</sup>. Correlation coefficients for the fit calculated by Chimera<sup>35</sup> are 0.86, 0.83 and 0.92 respectively. (d) EM density of intact *Tt\_A*-ATPase, with composite model showing good fit of the PS1 structure into distal peripheral stalk EM density. (e) EM density of intact *Tt\_A*-ATPase, with composite model showing the inferior fit of PS1 into proximal peripheral stalk EM density. (f) EM density of intact *Tt\_A*-ATPase, with composite model showing improved fit of the PS3 model into proximal peripheral stalk EM density.

### Supplementary Figure S3: Normal Mode Analysis of PS2

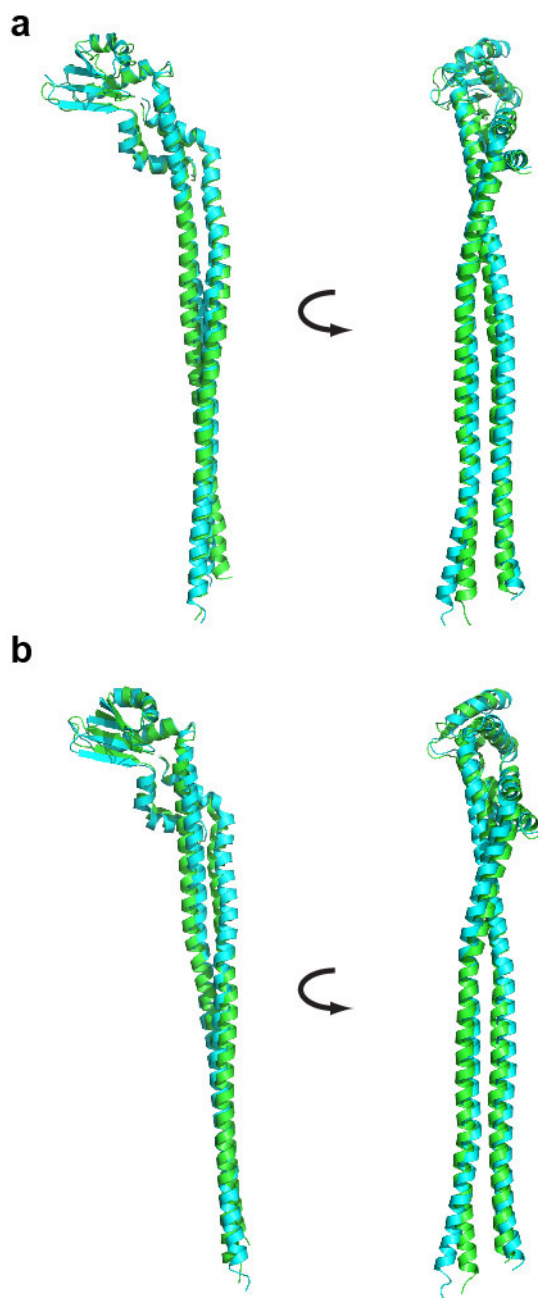

Normal Mode Analysis of PS2. Comparison of crystal and EM models with their simulated NMA counterparts using modes 7 ( $\omega = 15.9 \text{ cm}^{-1}$ ) and 8 ( $\omega = 31.2 \text{ cm}^{-1}$ ) applied to PS2. **(a)** PS1 crystal structure in green and PS2->PS1 NMA model ( $A = -124$  and  $82$ ) in cyan. **(b)** PS3 EM model in green and PS2->PS3 NMA model ( $A = -282$  and  $86$ ) in cyan.

**Supplementary Figure S4: Right-handed coiled-coil domain architecture of the peripheral stalk complex**

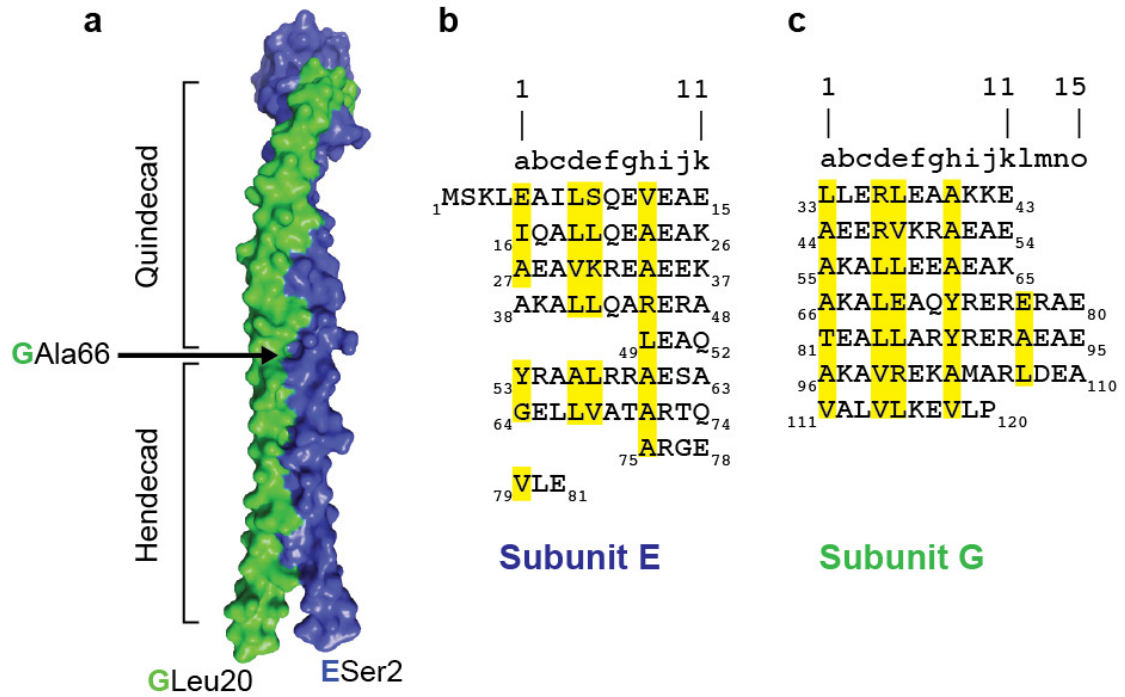

Right-handed coiled-coil domain architecture of the peripheral stalk complex (**a**) as encoded in hendecad (11-mer) and quindecad (15-mer) sequence repeats in subunits E (**b**) and G (**c**) – adapted from reference (26).

### Supplementary Figure S5: Flexibility of a right-handed coiled-coil

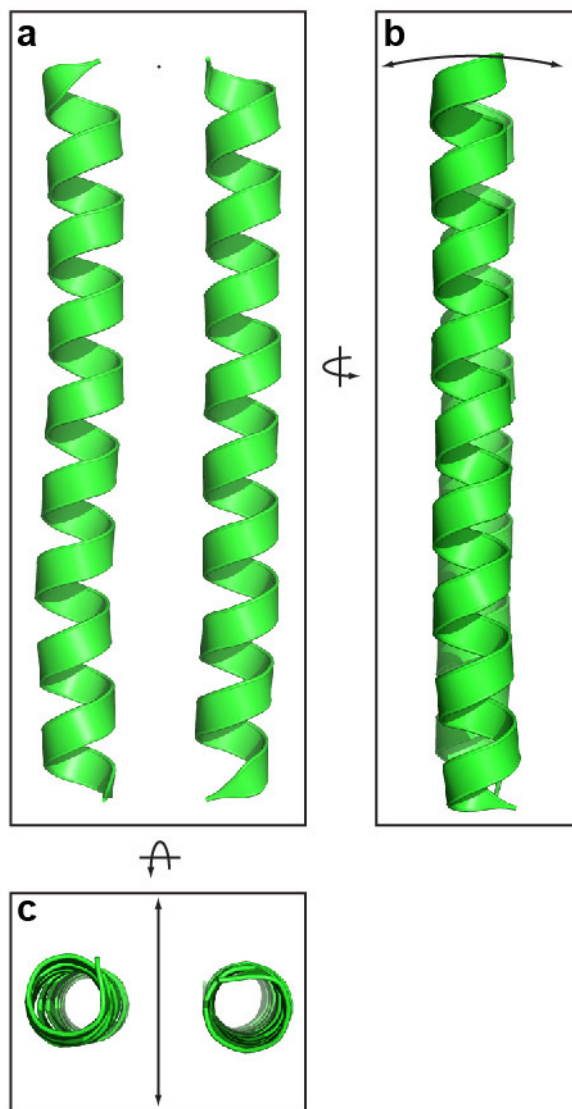

Example of right-handed coiled-coil consisting of pure hendecad repeats leading to parallel helices (pdb entry 1fe6<sup>61</sup>) with arrow indicating the direction of greatest flexibility according to NMA. Parallel coils are flexible in a plane perpendicular to the broad face of the coil (which has the least cross-sectional area), similar to the mechanical properties of a rectangular beam or that of a ruler.

### Supplementary Figure S6: Example electron density

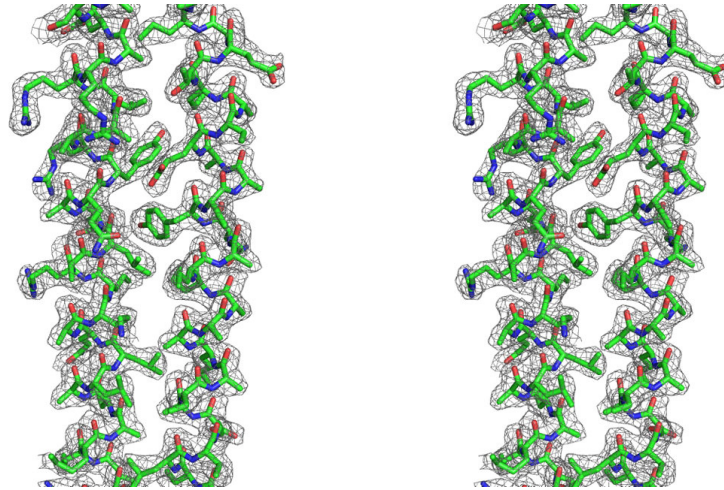

Stereo view of the 2Fo-Fc electron density map of the peripheral stalk from *Tt*\_ATPase to 2.25 Å resolution. Region shown corresponds to residues 37-61 of subunit E and 58-84 of subunit G, with  $\sigma$  cut-off set to 1.0.

### Supplementary References:

61. Stetefeld, J. et al. Crystal structure of a naturally occurring parallel right-handed coiled coil tetramer. *Nature structural biology* **7**, 772-6 (2000).
62. Drory, O., Frolov, F. & Nelson, N. Crystal structure of yeast V-ATPase subunit C reveals its stator function. *EMBO reports* **5**, 1148-52 (2004).
